# Supplementary material for: Priming and positioning of lateral roots in Arabidopsis. An approach for an integrating concept
Source: PubMed Central journal article supplement (PMC4762386; doi:10.1093/jxb/erv541), 2015-12-27
Supplement: supp_erv541_Supplementary_figures_S1_S4.pdf [file supp_erv541_Supplementary_figures_S1_S4.pdf]

Manuscript title and authors:

**Priming and positioning of lateral roots in Arabidopsis. An approach for an integrating concept.**

**Stefan Kircher and Peter Schopfer**

**Supplementary Data**

**Fig. S1**

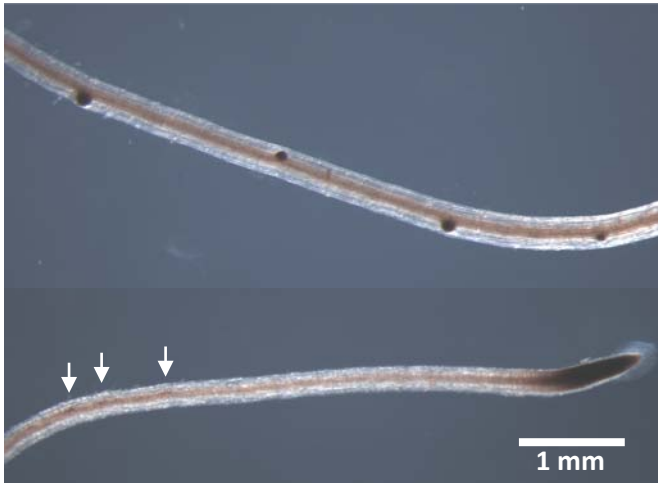

**Fig. S1.** Staining of LRPs with acetocarmine 20 mm behind the root tip (above) and close to the root tip (below).

Fig. S2

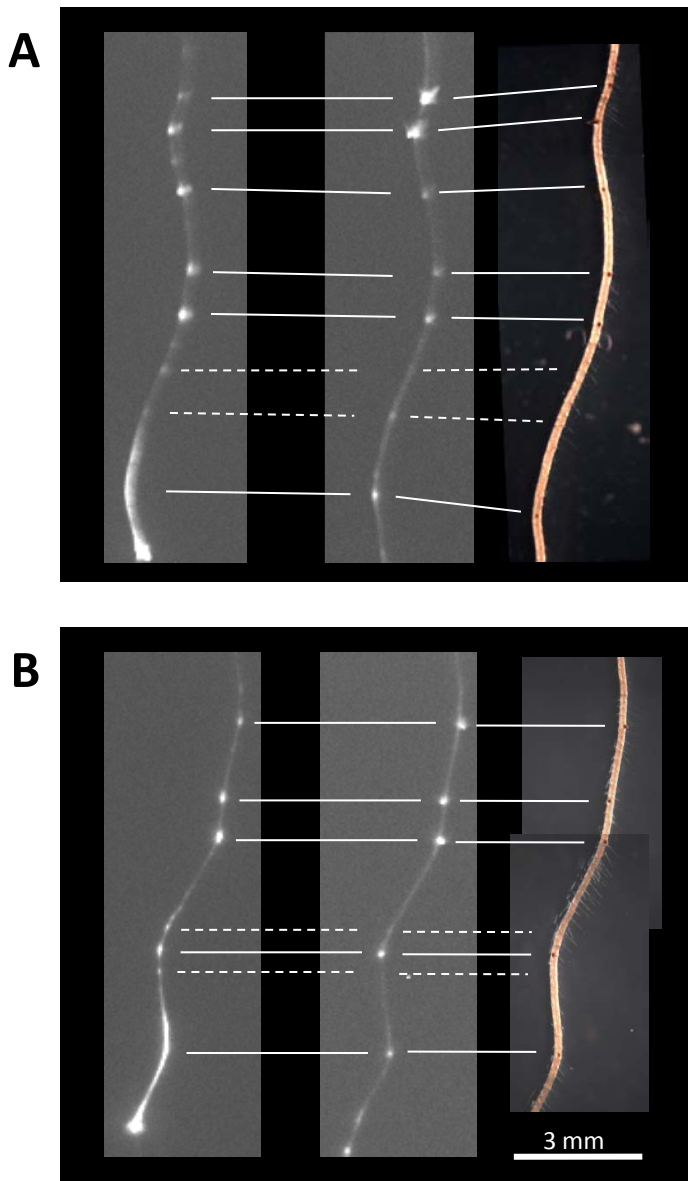

**Fig. S2.** Detection of prebranch sites and LRPs by *pDR5:LUC* imaging and acetocarmine staining, respectively. In the two examples (*A,B*) a segment close to the root tip of a 5-d-old seedling harboring the *pDR5:LUC* transgene was analyzed for LUC activity immediately (*left*) and after 24 h of additional growth (*middle*) followed by fixation and staining (*right*). The distance between the latest prebranch site and the first LRP detectable by staining is in the range of 3-4 mm. The dashed lines mark non-persistent spots of LUC activity that did not produce LRPs.

Fig S3

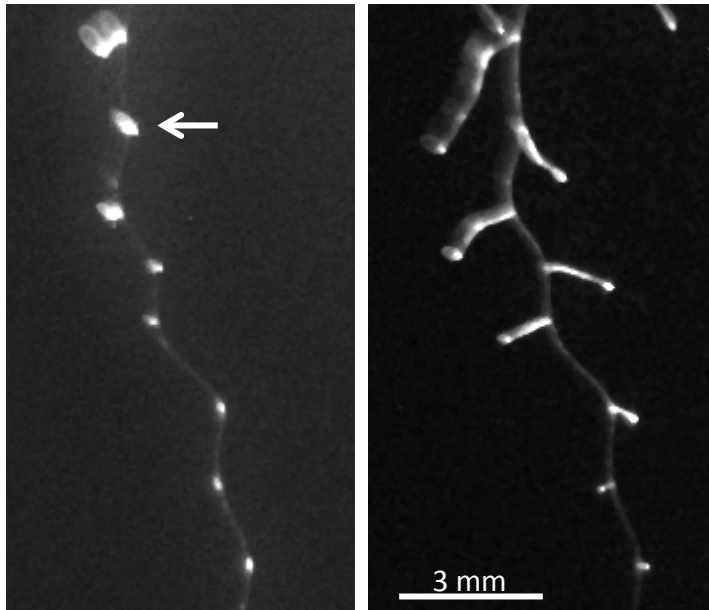

**Fig. S3.** Generation of prebranch sites and their conversion into LRs in a root subjected to periodic gravistimulation (4-h-intervals, Fig. 3D). *pDR5:LUC* expression was imaged after 24 h of gravistimulation (*left*, start at arrow) and again 24 h later (*right*).

Fig. S4

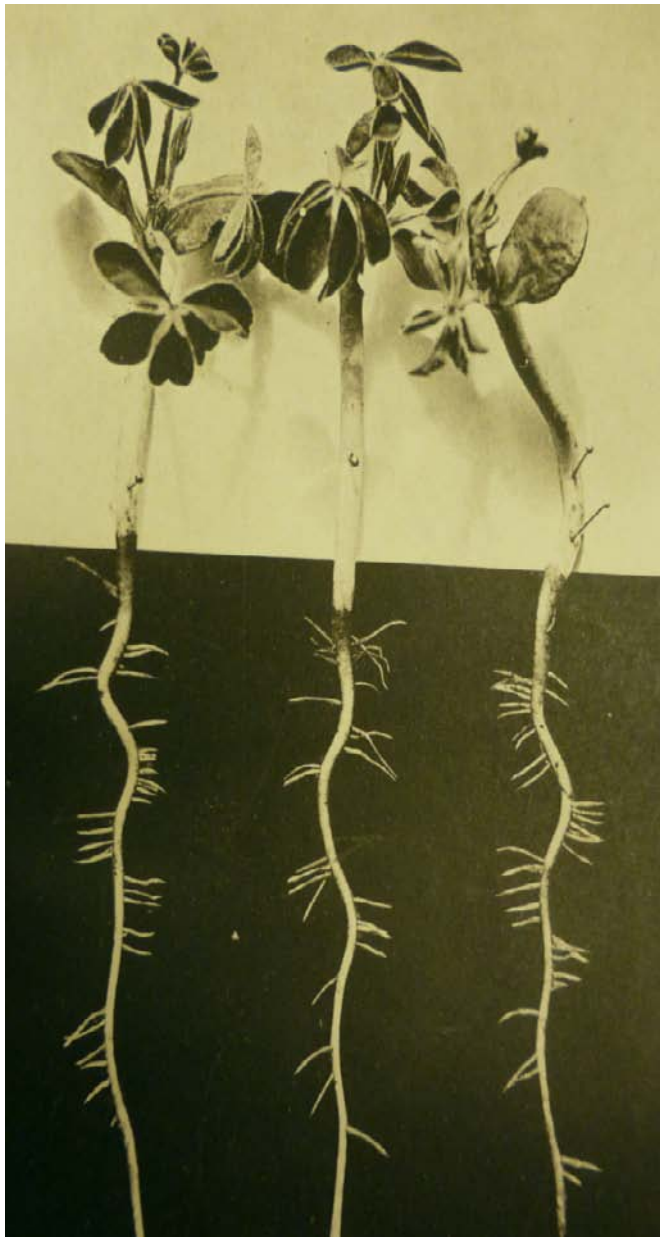

**Fig. S4.** Pattern of LR formation in soil-grown seedlings of *Lupinus albus* demonstrating the clustering response at the convex side of gravitropically induced bends. Picture reproduced from a publication by F. Noll (1900) describing also many other basic features of LR generation rediscovered in recent years in *Arabidopsis*.
